# Supplementary material
Source: PubMed Central journal article supplement (PMC3880548)
Supplement: NIHMS427104-supplement-1_si_001.pdf [file NIHMS427104-supplement-1_si_001.pdf]

## SUPPORTING INFORMATION

### ***Impact of quaternary structure upon bacterial cytochrome c peroxidases: does homodimerization matter?***

Katie E. Ellis, Katherine E. Frato, Sean J. Elliott\*

Department of Chemistry, Boston University, 590 Commonwealth Ave., Boston, MA 02215

| Organism of origin<br>(oxidation state)                   | Interfacial<br>residues | Number of charged<br>interfacial residues | Total area (Å <sup>2</sup> )<br>of interface | Charged pairs<br>across the dimer | PDB<br>code |
|-----------------------------------------------------------|-------------------------|-------------------------------------------|----------------------------------------------|-----------------------------------|-------------|
| <i>Shewanella oneidensis</i><br>(fully reduced)           | 50                      | 7                                         | 1930                                         | 6                                 | 3OSC        |
| <i>Pseudomonas aeruginosa</i><br>(oxidized)               | 35                      | 11                                        | 1207                                         | 7                                 | 1EB7        |
| <i>Pseudomonas aeruginosa</i><br>(semi-reduced)           | 46                      | 10                                        | 1591                                         | N/A                               | 2VHD        |
| <i>Pseudomonas nautica</i><br>(oxidized)                  | 34                      | 8                                         | 1204                                         | N/A                               | 1RZ6        |
| <i>Pseudomonas nautica</i><br>(semi-reduced)              | 44                      | 8                                         | 1563                                         | N/A                               | 1RZ5        |
| <i>Geobacter sulfurreducens</i><br>(oxidized)             | 38                      | 8                                         | 1333                                         | 2                                 | 3HQ6        |
| <i>Geobacter sulfurreducens</i><br>S134P/V135K (oxidized) | 45                      | 8                                         | 1714                                         | 2                                 | 3HQ8        |
| <i>Rhodobacter capsulatus</i><br>(oxidized)               | 37                      | 12                                        | 1231                                         | 8                                 | 1ZZH        |
| <i>Paracoccus pantotrophus</i><br>(oxidized)              | 39                      | 5                                         | 1342                                         | 4                                 | 2C1U        |
| <i>Paracoccus pantotrophus</i><br>(semi-reduced)          | 46                      | 6                                         | 1706                                         | 2                                 | 2C1V        |
| <i>Nitrosomonas europaea</i><br>(oxidized)                | 51                      | 10                                        | 1987                                         | 6                                 | 1IQC        |

Table S1. Details of PisaPSE server analysis on the dimeric interfaces of structurally characterized bCcP enzymes

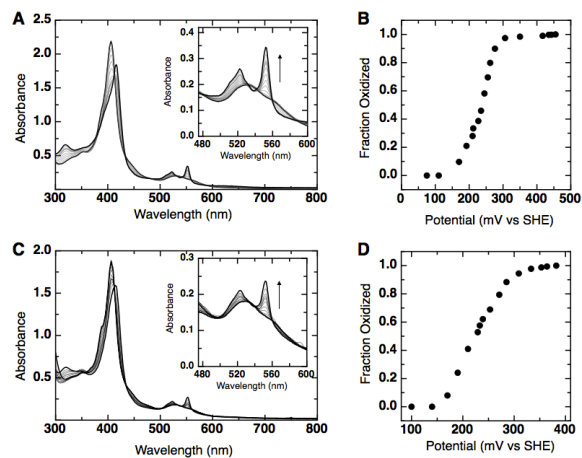

Figure S1. Potentiometric redox titrations of *Shewanella oneidensis* cytochrome c peroxidase (A/B) wild-type and (C/D) E258K charge reversal mutant. Plots A and C show the optical changes associated with the electrochemical reduction of the high potential heme. Plots B and D show the curves which give Nernst plots of 1 electron redox centers and the midpoint potential of the high potential heme centers.
